# Supplementary material
Source: publisher site journal article supplement (https://static.cambridge.org/content/id/urn:cambridge.org:id:article:S002211201500590X/resource/name/FLM1500590supp.zip)
Supplement: Supplementary file 1 [file FLM1500590supp.zip]

# Supplementary material for “Displacement flows under elastic membranes. Part 1.”

**Draga Pihler-Puzović<sup>1</sup> †, Anne Juel<sup>1</sup>, Gunnar G. Peng<sup>3</sup> John R. Lister<sup>3</sup> and Matthias Heil<sup>2</sup>**

<sup>1</sup>Manchester Centre for Nonlinear Dynamics and School of Physics and Astronomy, University of Manchester, Oxford Road, Manchester, M13 9PL, UK

<sup>2</sup>School of Mathematics and Manchester Centre for Nonlinear Dynamics, University of Manchester, Oxford Road, Manchester, M13 9PL, UK

<sup>3</sup>Department of Applied Mathematics and Theoretical Physics, University of Cambridge, Wilberforce Road, Cambridge, CB3 0WA, UK

The supplementary material contains the experimental and numerical data supporting the publication “Displacement flows under elastic membranes. Part 1.”. The folder names are chosen in accord with the corresponding figures. Each file contains a description of its content. The notations follows the notation in the manuscript and the caption to the figures in particular.

† Email address for correspondence: draga.pihler-puzovic@manchester.ac.uk
